# Supplementary material
Source: publisher figshare collection journal article supplement (https://karger.figshare.com/ndownloader/files/27977451)
Supplement: Supplementary file 1 [file 27977451]

Table S1 Detailed search terms of each of search engines used in analysis.

| PubMed | Esophageal Achalasia [Mesh Terms] OR Achalasias, Esophageal OR Esophageal Achalasias OR Cardiospasm OR Cardiospasms OR Achalasia OR Achalasias OR Achalasia, Esophageal OR Megaesophagus  AND  POEM OR Per-oral endoscopic myotomy OR Peroral endoscopic myotomy OR Per oral endoscopic myotomy |
| --- | --- |
| Embase | “achalasia”:ab,ti OR “achalasia cardiae”:ab,ti OR “achalasia esophagi”:ab,ti OR “cardia achalasia”:ab,ti OR “esophageal achalasia”:ab,ti OR “oesophageal achalasia”:ab,ti  AND  “POEM”:ab,ti OR “Per-oral endoscopic myotomy”:ab,ti OR “Peroral endoscopic myotomy”:ab,ti OR “Per oral endoscopic myotomy”:ab,ti |
| Cochrane | POEM OR Per-oral endoscopic myotomy OR Peroral endoscopic myotomy OR Per oral endoscopic myotomy |

Table S2 The clinical success rate at different follow-up time

| Study | ≤1 year | 1 to 3 years | ≥3 years |
| --- | --- | --- | --- |
| Wang et al. [13] | 95.2% (20/21) | 90% (9/10) | 100% (4/4) |
| Chen et al. [14] | - | 90.8% (59/65) | - |
| Landi et al. [15] | 95.4% (84/88) | - | - |
| Liu et al. [16] | 95.3% (81/85) | 94.1% (80/85) | 92.9% (79/85) |
| Abe et al. [18] | 100% (17/17) | - | - |
| Sanaka et al. [19] | 94.7% (36/38) | - | - |

Table S3 Detailed analysis of adverse event.

| Study | Mild | Moderate | Severe | Fatal |
| --- | --- | --- | --- | --- |
| Wang et al. [13] | Subcutaneous emphysema:1 | - | - | - |
| Chen et al. [14] | Inadvertent mucosotomy:3;  Capnoperitoneum/capnothorax/capnomediastinum needing drainage:5;  Inadvertent entry into the mediastinum:2;  Esophageal leak:1 | Capnoperitoneum/capnothorax/  capnomediastinum needing drainage:1;  Esophageal leak:1 | Cardiac arrhythmia:1 | - |
| Landi et al. [15] | - | - | - | - |
| Liu et al. [16] | - | Bleeding requiring intervention or transfusion:1;  Pneumothorax requiring drainage:3 | - | - |
| Klair et al. [17] | Pneumothorax:1;  Anaphylaxis to medication:1 | Esophageal leak:1;  Esophageal stricture:1;  Both esophageal stricture and leak:1 | - | - |
| Abe et al. [18] | Inadvertent mucosal perforation of mucosal flap:2 | ICU stay:1; Leak:2;  Bleeding requiring blood transfusion:1;  Surgical/other intervention:2;  Readmission within 30 days:1;  IV antibiotics > 5 days:3; Pneumonia:1;  Disability requiring higher level care:4 | Cardiac arrythmia:1 | - |
| Sanaka et al. [19] | - | Readmission within 30 days:2; Other:1 | - | - |

Table S4 Quality assessment of studies with NIH quality assessment tool for before-after studies with no control group.

| Criteria | Wang et al. [13] | Chen et al. [14] | Landi et al. [15] | Liu et al. [16] | Klair et al. [17] | Abe et al. [18] | Sanaka et al. [19] |
| --- | --- | --- | --- | --- | --- | --- | --- |
| 1. Was the study question or objective clearly stated? | Yes | Yes | Yes | Yes | Yes | Yes | Yes |
| 2. Were eligibility/selection criteria for the study population prespecified and clearly described? | Yes | Yes | Yes | Yes | Yes | Yes | Yes |
| 3. Were the participants in the study representative of those who would be eligible for the test/service/ intervention in the general or clinical population of interest? | Yes | Yes | Yes | Yes | Yes | Yes | Yes |
| 4. Were all eligible participants that met the prespecified entry criteria enrolled? | Yes | Yes | Yes | Yes | Yes | Yes | Yes |
| 5. Was the sample size sufficiently large to provide confidence in the findings? | No | Yes | Yes | Yes | Yes | No | Yes |
| 6. Was the test/service/intervention clearly described and delivered consistently across the study population? | Yes | Yes | Yes | Yes | Yes | Yes | Yes |
| 7. Were the outcome measures prespecified, clearly defined, valid, reliable, and assessed consistently across all study participants? | Yes | Yes | Yes | Yes | Yes | Yes | Yes |
| 8. Were the people assessing the outcomes blinded to the participants’ exposures/interventions? | No | No | No | No | No | No | No |
| 9. Was the loss to follow-up after baseline 20% or less? Were those lost to follow-up accounted for in the analysis? | Yes | Yes | No | No | No | No | No |
| 10. Did the statistical methods examine changes in outcome measures from before to after the intervention? Were statistical tests done that provided P values for the pre-to-post changes? | Yes | Yes | No | Yes | Yes | Yes | Yes |
| 11. Were outcome measures of interest taken multiple times before the intervention and multiple times after the intervention? | Yes | Yes | No | Yes | No | Yes | Yes |
| 12. If the intervention was conducted at a group level, did the statistical analysis take into account the use of individual-level data to determine effects at the group level? | N/A | N/A | N/A | N/A | N/A | N/A | N/A |
| Result | Fair | Good | Fair | Fair | Fair | Fair | Fair |

*NIH* National Institutes of Health, *N/A* not applicable
